# Supplementary material for: The RNA binding protein HuR determines the differential translation of autism-associated FoxP subfamily members in the developing neocortex
Source: Sci Rep. 2016 Jul 7;6:28998. doi: 10.1038/srep28998 (PMC4935837; doi:10.1038/srep28998)
Supplement: Supplementary Information [file srep28998-s1.pdf]

**The RNA binding protein HuR determines the differential translation of autism-associated FoxP subfamily members in the developing neocortex**

Popovitchenko T<sup>1</sup>, Thompson K<sup>1</sup>, Viljetic B<sup>1</sup>, Jiao X<sup>2</sup>, Kontonyiannis DL<sup>3</sup>, Kiledjian M<sup>2</sup>, Hart RP<sup>2</sup>, Rasin MR<sup>1,+</sup>

<sup>1</sup>Department of Neuroscience and Cell Biology, Rutgers University, Robert Wood Johnson Medical School, Piscataway, 08854, NJ, USA

<sup>2</sup>Department of Cell Biology and Neuroscience, Rutgers University, Piscataway, 08854, NJ, USA

<sup>3</sup>Institute of Immunology, Biomedical Sciences Research Center Alexander Fleming, Vari, Greece

<sup>+</sup> corresponding co-author:

E-mail: [roko.rasin@rutgers.edu](mailto:roko.rasin@rutgers.edu)

Phone: 1-732-235-4553

## Supplementary Figure Legends

**Figure S1. HuR binds a subset of Fox mRNAs in developing neocortices.** (a) Volcano analysis of HuR RIP-ChIPs identified transcripts selected for a 5% FDR and at least 2-fold enrichment over IgG control. (b) Odds ratio for overlapping gene symbols between early and late HuR RIP-ChIP identified transcripts and those reported to bind FMRP<sup>4</sup> or those associated with Autism (<http://gene.sfari.org>). (c) Additional RIPs followed by quantitative RT-PCR analysis of HuR and IgG precipitates confirmed binding of the remaining forkhead mRNAs across neocortico-genesis. Error bars represent SD. \*p<0.05. (d) HuR did not preferentially precipitate any splice variant of *Foxp1* or *Foxp2*. Array data were plotted to the indicated genome regions using the GenomeGraphs package in R/Bioconductor.

**Figure S2. Figure S6. HuR cell-autonomously regulates neocortical expression of FOXP2 protein.** (a) *HuR* deletion did not disrupt nuclear-cytoplasmic distribution within P0 neocortices in *Emx-Cre* animals. (b) Successful knockdown of HuR protein using HuR shRNAs. N2a cells were transfected for 72 hours with either Ctrl or HuR shRNAs. Subsequent immunoblotting analysis revealed significant reduction in HuR protein expression with HuR shRNA but not with Ctrl. GAPDH was used as a loading control. (c) *In utero* electroporation (IUE) of vectors expressing *Green fluorescent protein (Gfp)* and either control (Ctrl) shRNA or *HuR* shRNA was performed at E13 and examined at E18. GFP-positive neurons (green) expressing Ctrl shRNA showed significant HuR expression (red; overlap seen in yellow; left panel) whereas little to no HuR signal was seen in GFP-positive neurons expressing HuR shRNA (middle panel). HuR protein expression was rescued when HuR shRNA was co-electroporated with human HUR cDNA (right panel), indicating specificity of HuR shRNA. (d) Silencing of HuR resulted in significant decrease of FOXP2 protein expression (p<0.01). When HuR silencing was rescued using human HuR cDNA, the expression of FOXP2 protein was also rescued. (e) Schematic of experimental approach in (f,g) co-IUE of E13 neocortices with Ctrl shRNA/Gfp or *HuR* shRNA/Rfp constructs

in same litter. Primary neuronal cultures prepared from pooled electroporated neocortices were analyzed after 5 DIV by immunohistochemistry for Foxp2 in transfected cells for primary neuron experiment shown in **(f,g)**. Representative images show Foxp2 staining (blue) in neurons co-electroporated with HuR shRNA (green) and control shRNA (red). **(h)** Quantifications of confocal images revealed significant decrease of Foxp2 positive neurons in *HuR* shRNA/Gfp neurons when compared to Ctrl shRNA/Rfp neurons. Error bars represent SEM, \*\*\*\*= $p < 0.0001$ .

### **Supplementary Table Legends**

Table S1. Overlapping gene targets of HuR and SFARI database: Shown in three columns, left to right, early, late, and common.

Table S2. Overlapping gene targets between RBPs FMRP and HuR at early stages (E11 & E13)

Table S3. Primary antibodies used

Table S4. Secondary antibodies used

Table S5. qRT-PCR probes used

Figure S1

a

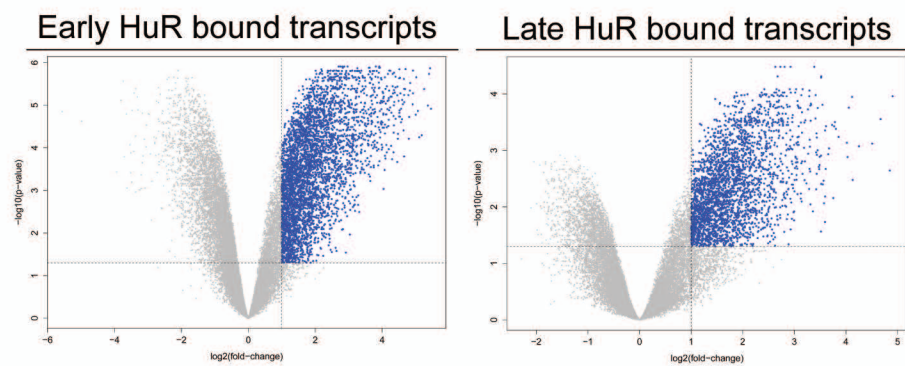

b

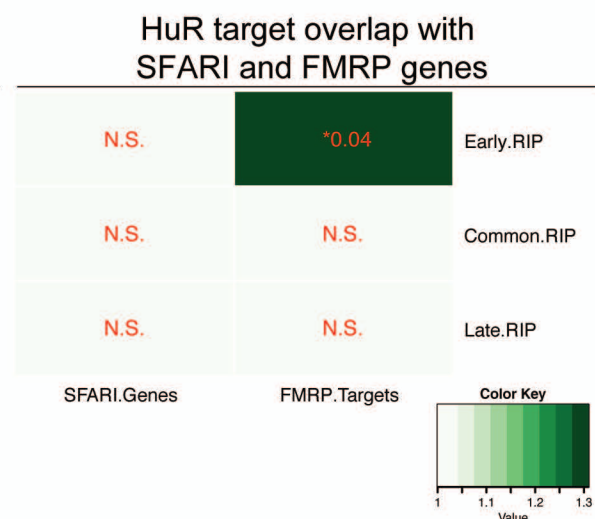

c

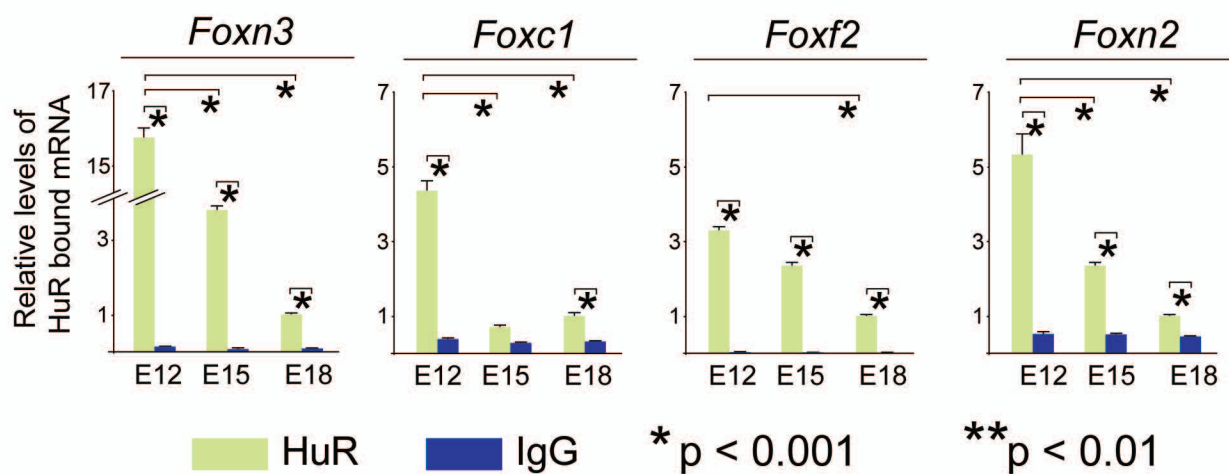

d

HuR vs. IgG RIP

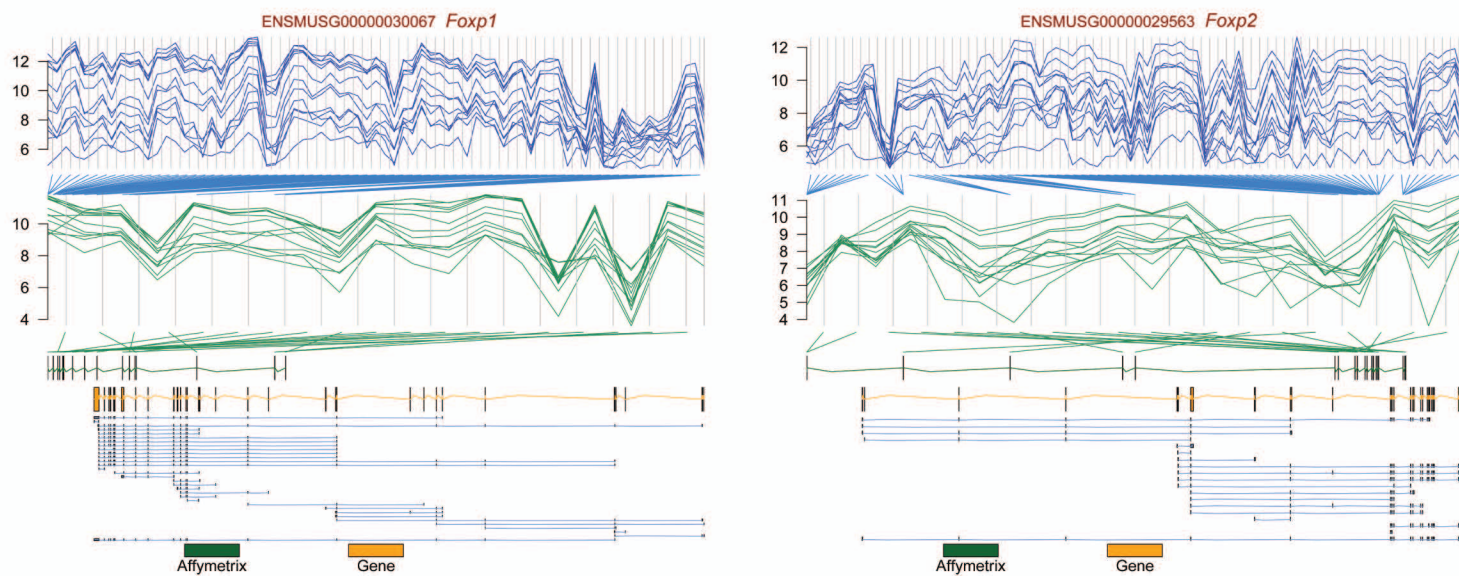

Figure S2

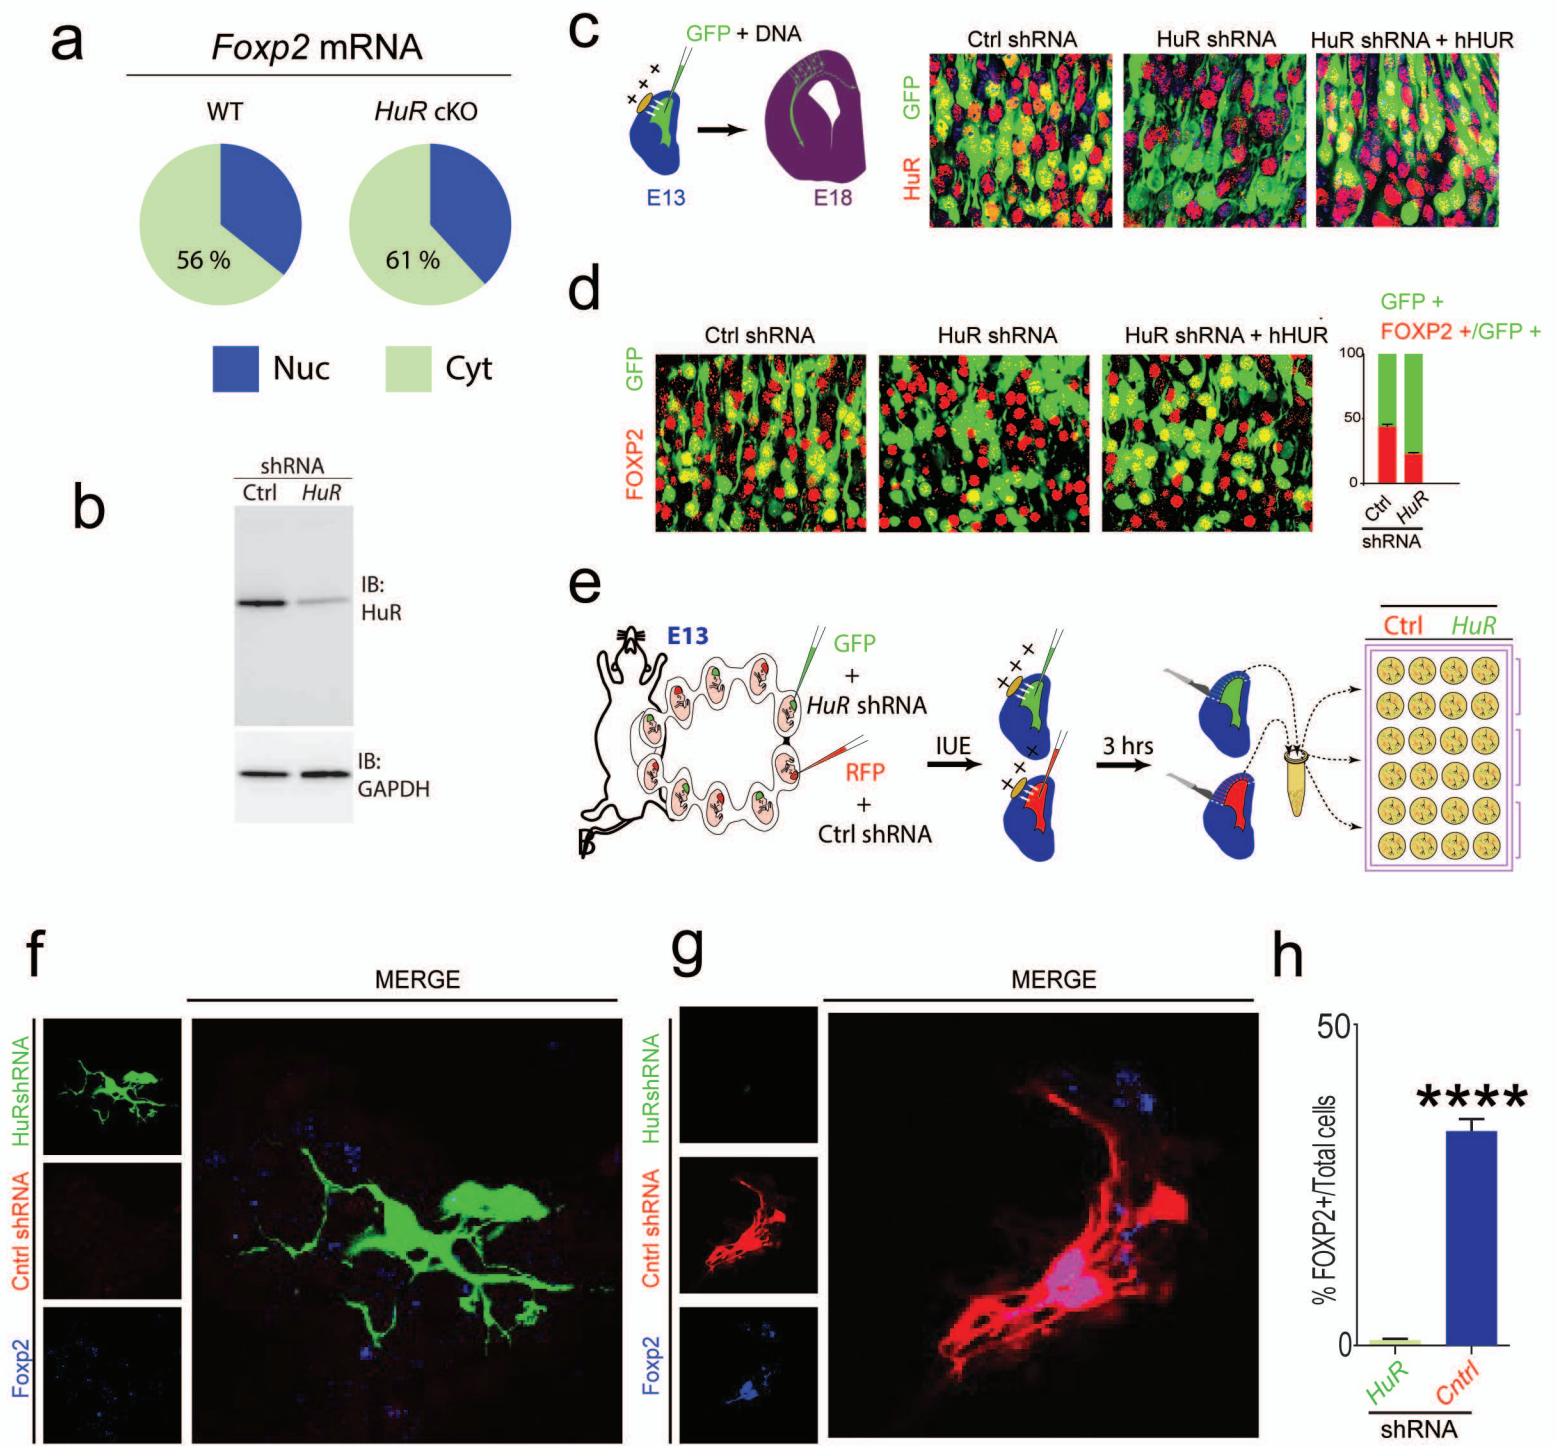

**Table S1: Overlapping gene targets of HuR and SFARI database**

| Early    | Common | Late    |
|----------|--------|---------|
| ALDH5A1  | CADM1  | APC     |
| ANK2     | CD38   | SLITRK5 |
| CADPS2   | CYFIP1 |         |
| DAB1     | DHCR7  |         |
| FOXP2    | DLG4   |         |
| MEF2C    | DRYK1A |         |
| NF1      | FMR1   |         |
| NRG1     | FOXP1  |         |
| PAFAH1B1 | GSK3B  |         |
| PCDH10   | HOMER1 |         |
|          | NLGN3  |         |
|          | PTEN   |         |
|          | UBE3A  |         |

**Table S2: Overlapping gene targets of HuR and FMRP**

|               |        |          |        |
|---------------|--------|----------|--------|
| 1110012J17RIK | DPP8   | NCAM1    | TNKS   |
| 1110018G07RIK | DPYSL2 | NF1      | TNRC6B |
| 1200009O22RIK | EHMT1  | NUP98    | TRIO   |
| 4921513D23RIK | HERC1  | PCDH10   | TRRAP  |
| ACTB          | HIPK1  | PDE4DIP  | TULP4  |
| ANK2          | HIPK3  | PPARGC1A | USP9X  |
| ARHGEF11      | INPP4A | PTPRD    | ZFP462 |
| BMPR2         | LPHN3  | SAPS2    | ZFP521 |
| C230096C10RIK | LRRC41 | SASH1    | ZFP536 |
| CALM1         | MED13L | SCD2     |        |
| CALM3         | MIB1   | SLC12A6  |        |
| DIP2B         | MKL2   | SLC8A1   |        |
| DLG5          | MTMR4  | STXBP1   |        |
| DOPEY1        | MYO10  | TCF4     |        |

**Table S3: Primary Antibodies**

| Name             | Species | Cat. #   | Supplier       | [Conc.]   | Dilution | Use      |
|------------------|---------|----------|----------------|-----------|----------|----------|
| Anti-ELAV1/HUR   | Rabbit  | RN004P   | MBL            | 1 mg/mL   | 1:500    | WB       |
| Bcl11b (25B6)    | Rat     | SC-56014 | Santa Cruz     | 100 µg/mL | 1:100    | IHC      |
| Foxp1            | Rabbit  | AB16645  | Abcam          | 1 mg/mL   | 1:1000   | IHC      |
| Foxp1            | Mouse   |          | Tucker Lab     |           | 1:1000   | WB       |
| Foxp2 (N-16)     | Goat    | SC-21069 | Santa Cruz     | 100 µg/mL | 1:250    | IHC, ICC |
|                  |         |          |                |           | 1:500    | WB       |
| Gapdh            | Mouse   | MAB374   | Millipore      | 1 mg/mL   | 1:5000   | WB       |
| HuR              | Mouse   | 39-0600  | Invitrogen     |           | 1:250    | IHC      |
|                  |         |          |                |           | 1:500    | WB       |
| HuR (19F12)      | Mouse   | SC-56709 | Santa Cruz     | 100 µg/mL | 1:1000   | IHC      |
|                  |         |          |                |           | 1:500    | WB       |
| HuR (N-16)       | Goat    | SC-5483  | Santa Cruz     | 200 µg/mL | 1:1000   |          |
| P-Vimentin (S56) | Rabbit  | 3877S    | Cell Signaling | 1 mg/mL   | 1:100    | IHC      |
| P-Vimentin       | Mouse   | D076-3   | MBL            | 1 mg/mL   | 1:250    | WB       |
| Pax6             | Rabbit  | PRB-278P | Covance        | 2 mg/mL   | 1:500    | WB       |

**Table S4: Secondary Antibodies**

| Name               | Fluorophore/<br>Conjugate | Cat. #      | Supplier                | Dilution |
|--------------------|---------------------------|-------------|-------------------------|----------|
| Donkey anti-Goat   | 488                       | 705-485-147 | Jackson Immuno Research | 1:250    |
| Donkey anti-Goat   | Cy3                       | 705-165-147 | Jackson Immuno Research | 1:250    |
| Donkey anti-Goat   | HRP                       | 705-035-147 | Jackson Immuno Research | 1:5000   |
| Donkey anti-Goat   | HRP                       | 705-035-003 | Jackson Immuno Research | 1:5000   |
| Donkey anti-Mouse  | Cy3                       | 715-165-151 | Jackson Immuno Research | 1:250    |
| Donkey anti-Mouse  | Cy5                       | 715-605-151 | Jackson Immuno Research | 1:250    |
| Donkey anti-Mouse  | HRP                       | 715-035-150 | Jackson Immuno Research | 1:5000   |
| Donkey anti-Rabbit | 488                       | 715-545-152 | Jackson Immuno Research | 1:250    |
| Donkey anti-Rabbit | HRP                       | 711-035-152 | Jackson Immuno Research | 1:2500   |
| Donkey anti-Rat    | 649                       | 712-495-153 | Jackson Immuno Research | 1:250    |

**Table S5: qRT-PCR Probes**

| <b>Name</b>    | <b>Mm. #</b>  | <b>Lot</b>      | <b>Company</b>     |
|----------------|---------------|-----------------|--------------------|
| FoxC1          | Mm01962704_s1 | 761452          | Applied Biosystems |
| FoxF2          | Mm00515793_m1 | 487722          | Applied Biosystems |
| FoxN2          | Mm00839106_g1 | 454413          | Applied Biosystems |
| FoxN3          | Mm02343199_g1 | 574053          | Applied Biosystems |
| FoxO6          | Mm00809934_s1 | 499576          | Applied Biosystems |
| FoxP1          | Mm00474845_m1 | 722413          | Applied Biosystems |
| FoxP2 FAM long | Mm01161745_m1 | P120613-001 H12 | Applied Biosystems |
| Foxp2 FAM pan  | Mm00475031_m1 | P120613-001 H11 | Applied Biosystems |
| GAPDH          | Mm03302249_g1 | 1067721         | Applied Biosystems |
| PTMA           | Mm02342431_g1 | 716417          | Applied Biosystems |
